# Supplementary material for: Estimating species sensitivity distributions on the basis of readily obtainable descriptors and toxicity data for three species of algae, crustaceans, and fish
Source: PeerJ. 2021 Mar 3;9:e10981. doi: 10.7717/peerj.10981 (PMC7936562; doi:10.7717/peerj.10981)
Supplement: Supplemental Information 1 [file peerj-09-10981-s003.xlsx]

## Sheet: Table_S1_Data
ID	CAS	IUPAC_name	Smiles	Number of tox data	Number of species	Mean	SD	Median_mean_3sp	Median_SD_3sp	MW	LogKow	LogVP	Biodegradability	Class4	Class3	Verhaar	Data	mean_3sp_1	sd_3sp_1	mean_3sp_2	sd_3sp_2	mean_3sp_3	sd_3sp_3	mean_3sp_4	sd_3sp_4	mean_3sp_5	sd_3sp_5
1	100-42-5	Styrene	C=CC1=CC=CC=C1	11	8	1.06625	0.674789	0.619644	0.352138	104.2	2.89	0.697229	3.7024	0	0	Class 1 (narcosis or baseline toxicity)	Test	0.868494	0.759675	0.452293	0.168063	0.452293	0.168063	0.897817	0.809301	0.517768	0.213772
2	100-52-7	benzaldehyde	C1=CC=C(C=C1)C=O	11	9	1.27088	0.67797	1.41049	0.345678	106.12	1.71	0.00432137	3.8962	0	1	Class 3 (unspecific reactivity)	Training	1.448	0.283893	1.41778	0.333571	1.41778	0.333571	1.07783	0.913142	1.3119	0.511825
3	106-42-3	1,4-xylene	CC1=CC=C(C=C1)C	12	8	1.22206	0.758949	0.884691	0.160766	106.17	3.09	0.838219	3.5575	0	0	Class 1 (narcosis or baseline toxicity)	Training	0.710981	0.281076	0.923683	0.160766	0.923683	0.160766	0.884691	0.123574	0.710981	0.281076
4	106-44-5	4-methylphenol	CC1=CC=C(C=C1)O	15	9	1.29879	0.415953	1.20102	0.197134	108.14	2.06	-0.906578	3.6629	0	1	Class 3 (unspecific reactivity)	Test	1.2031	0.13386	1.11618	0.235464	1.11618	0.235464	1.17503	0.348839	1.2031	0.13386
5	106-46-7	1,4-dichlorobenzene	C1=CC(=CC=C1Cl)Cl	11	8	0.720663	0.77112	0.904105	0.347285	147	3.28	-0.180456	3.305	0	1	Class 3 (unspecific reactivity)	Training	0.568236	0.24858	0.568236	0.24858	0.739873	0.184108	0.739873	0.184108	0.874726	0.55346
6	106-47-8	4-chloroaniline	C1=CC(=CC=C1N)Cl	14	10	1.0735	0.720371	0.466897	1.01036	127.57	1.72	-1.62525	3.39	0	1	Class 3 (unspecific reactivity)	Training	0.60925	1.03051	0.474353	0.862162	0.474353	0.862162	0.37734	0.88295	0.60925	1.03051
7	106-48-9	4-chlorophenol	C1=CC(=CC=C1O)Cl	25	16	0.919292	0.359086	0.869597	0.263847	128.56	2.16	-1.39794	3.5366	0	1	Class 3 (unspecific reactivity)	Training	1.03198	0.313819	0.697632	0.136055	0.942172	0.204011	0.904979	0.37968	0.822049	0.12788
8	107-02-8	prop-2-enal	C=CC=O	17	13	-0.94515	0.783534	-0.951601	0.850684	56.06	0.19	2.4216	3.9635	0	1	Class 3 (unspecific reactivity)	Training	-1.01124	0.771426	-0.951601	0.692906	-0.934808	1.08038	-0.949488	0.696493	-0.951601	0.692906
9	107-18-6	prop-2-en-1-ol	C=CCO	13	10	-0.0181567	0.592522	0.145565	0.659665	58.08	0.21	1.36173	3.8934	0	1	Class 3 (unspecific reactivity)	Training	0.145565	0.578472	0.0289995	0.690692	0.500643	0.437808	-0.0593223	0.754356	0.0289995	0.690692
10	108-38-3	1,3-xylene	CC1=CC(=CC=C1)C	12	9	1.09927	0.673717	0.857063	0.284787	106.17	3.09	0.820858	3.5575	0	0	Class 1 (narcosis or baseline toxicity)	Training	0.786918	0.156888	0.902772	0.335592	0.902772	0.335592	0.786918	0.156888	0.972917	0.258893
11	108-88-3	toluene	CC1=CC=CC=C1	20	13	1.36865	0.765288	1.17611	0.3953	92.13	2.54	1.37475	3.6512	0	0	Class 1 (narcosis or baseline toxicity)	Training	1.28144	0.74596	0.869863	0.273397	0.869863	0.273397	1.28144	0.74596	0.96463	0.185691
12	108-90-7	chlorobenzene	C1=CC=C(C=C1)Cl	20	13	1.19599	0.681571	1.01742	0.229845	112.6	2.64	0.96708	3.5249	0	1	Class 3 (unspecific reactivity)	Training	0.87975	0.194024	0.953063	0.170368	0.912236	0.238893	0.861763	0.204696	1.13152	0.131105
13	110-54-3	hexane	CCCCCC	10	8	1.72222	1.08853	1.18421	0.944681	86.2	3.29	2.17609	3.9925	0	0	Class 1 (narcosis or baseline toxicity)	Training	1.18421	0.769018	1.18421	0.769018	1.18421	0.769018	1.18421	0.769018	1.94212	0.98287
14	110-86-1	pyridine	C1=CC=NC=C1	11	9	1.56739	1.39179	0.0491489	1.20706	79.1	0.8	1.28556	3.7149	0	0	Class 2 (less inert compounds)	Test	0.0491489	1.20706	0.0491489	1.20706	0.0491489	1.20706	0.380883	1.72981	0.0491489	1.20706
15	110-91-8	morpholine	C1COCCN1	12	8	2.27227	0.408756	2.02252	0.482339	87.12	-0.56	1.03743	3.7556	0	0	Class 5 (Not possible to classify according to these rules)	Test	2.02252	0.482339	2.03499	0.503379	2.03499	0.503379	2.01566	0.470771	2.05741	0.541329
16	111-30-8	pentanedial	C(CC=O)CC=O	12	8	1.0945	0.732308	0.771271	0.290364	100.12	-0.18	0.274158	4.0966	0	0	Class 5 (Not possible to classify according to these rules)	Training	0.571694	0.14643	0.839311	0.303135	0.839311	0.303135	1.3018	1.1889	0.727481	0.223721
17	111-46-6	2-(2-hydroxyethoxy)ethanol	C(COCCO)O	9	8	4.49909	0.446303	4.53441	0.417779	106.12	-1.47	-2.57512	3.9438	0	0	Class 5 (Not possible to classify according to these rules)	Training	4.44977	0.588741	4.6572	0.4053	4.59145	0.343897	4.51552	0.648511	4.61034	0.363679
18	115-86-6	triphenyl phosphate	C1=CC=C(C=C1)OP(=O)(OC2=CC=CC=C2)OC3=CC=CC=C3	15	9	0.0715978	0.659167	0.0216589	0.516198	326.28	4.7	-6.32606	3.857	0	0	Class 5 (Not possible to classify according to these rules)	Training	-0.093313	0.516198	-0.189991	0.546564	-0.189991	0.546564	0.264792	0.153244	-0.093313	0.516198
19	120-82-1	1,2,4-trichlorobenzene	C1=CC(=C(C=C1Cl)Cl)Cl	17	12	0.227525	0.342038	0.296656	0.431296	181.45	3.93	-0.737549	3.0899	0	1	Class 3 (unspecific reactivity)	Test	0.260324	0.252321	0.421564	0.436029	0.421564	0.436029	0.260324	0.252321	0.283653	0.600947
20	122-14-5	dimethoxy-(3-methyl-4-nitrophenoxy)-sulfanylidene-λ5-phosphane	CC1=C(C=CC(=C1)OP(=S)(OC)OC)[N+](=O)[O-]	10	9	-2.54065	1.52106	-1.57366	2.30741	277.2	3.3	-4.11691	3.7362	1	0	Class 4 (Compounds and groups of compounds acting by a specific mechanism)	Training	-1.57366	2.30741	-1.57366	2.30741	-1.57366	2.30741	-1.57366	2.30741	-1.56958	2.30323
21	123-31-9	benzene-1,4-diol	C1=CC(=CC=C1O)O	10	8	-1.01126	0.247645	-1.14092	0.201594	110.11	1.03	-4.73049	3.7683	0	1	Class 3 (unspecific reactivity)	Training	-1.09632	0.155511	-1.14092	0.306163	-1.14092	0.306163	-1.05613	0.201594	-1.09632	0.155511
22	126-73-8	tributyl phosphate	CCCCOP(=O)(OCCCC)OCCCC	14	11	1.11682	0.435811	0.949699	0.428411	266.31	3.82	-2.45717	4.7361	0	0	Class 5 (Not possible to classify according to these rules)	Training	0.866313	0.236589	1.01574	0.747714	0.946752	0.654391	0.882826	0.569564	0.901544	0.636886
23	127-18-4	1,1,2,2-tetrachloroethene	C(=C(Cl)Cl)(Cl)Cl	13	8	0.564798	1.03814	0.0849208	1.32372	165.9	2.97	1.25042	3.206	0	0	Class 1 (narcosis or baseline toxicity)	Training	1.15616	0.395057	1.00682	0.476942	1.00682	0.476942	0.018382	1.48007	1.15616	0.395057
24	129-00-0	pyrene	C1=CC2=C3C(=C1)C=CC4=CC=CC(=C43)C=C2	16	10	-1.13887	0.868141	-0.595607	0.979245	202.25	4.93	-6.46344	2.8537	0	0	Class 1 (narcosis or baseline toxicity)	Training	-0.718632	0.985154	-0.870244	1.08327	-0.870244	1.08327	-0.718632	0.985154	-0.595607	0.928463
25	132-65-0	Dibenzothiophene	C1=CC=C2C(=C1)C3=CC=CC=C3S2	12	12	-0.636861	0.43018	-0.461572	0.431592	184.26	4.29	-3.78252	3.5819	0	0	Class 5 (Not possible to classify according to these rules)	Training	-0.439256	0.525897	-0.745324	0.112713	-0.713021	0.104572	-0.00103675	0.311534	-0.439256	0.525897
26	137-26-8	dimethylcarbamothioylsulfanyl N,N-dimethylcarbamodithioate	CN(C)C(=S)SSC(=S)N(C)C	15	11	-1.0589	1.2322	-1.16723	0.982703	240.4	1.7	-4.96257	3.5009	1	0	Class 4 (Compounds and groups of compounds acting by a specific mechanism)	Training	-0.605615	1.31138	-0.380513	1.00575	-1.16723	2.15306	-0.934877	0.845831	-1.97417	1.43923
27	141-43-5	2-aminoethanol	C(CO)N	9	9	1.86509	0.815976	1.52123	0.975844	61.1	-1.61	-0.383	3.9323	0	0	Class 5 (Not possible to classify according to these rules)	Test	1.52123	0.975844	1.40308	0.910343	1.40308	0.910343	1.52123	0.975844	1.78304	1.46389
28	1563-66-2	(2,2-dimethyl-3H-1-benzofuran-7-yl)<U+00A0>N-methylcarbamate	CC1(CC2=C(O1)C(=CC=C2)OC(=O)NC)C	27	20	-1.05361	1.32153	0.00939607	2.09547	221.26	2.3	-4.2815	3.5773	1	0	Class 4 (Compounds and groups of compounds acting by a specific mechanism)	Test	-0.208266	2.47689	-0.39004	2.9138	0.669237	1.42853	-0.111085	2.47765	0.146657	1.89074
29	2104-64-5	ethoxy-(4-nitrophenoxy)-phenyl-sulfanylidene-λ5-phosphane	CCOP(=S)(C1=CC=CC=C1)OC2=CC=C(C=C2)[N+](=O)[O-]	14	10	-1.69559	1.64502	-1.7778	1.4939	323.3	4.47	-5.67985	3.2778	1	0	Class 4 (Compounds and groups of compounds acting by a specific mechanism)	Training	-1.48107	1.07101	-1.99122	1.86431	-1.7292	1.44383	-1.48107	1.07101	-1.56607	1.4939
30	23184-66-9	N-(butoxymethyl)-2-chloro-N-(2,6-diethylphenyl)acetamide	CCCCOCN(C1=C(C=CC=C1CC)CC)C(=O)CCl	21	17	-0.156868	0.867796	0.044189	0.686495	311.85	4.84	-5.39686	3.6249	0	1	Class 3 (unspecific reactivity)	Training	-0.205323	0.664617	0.453765	0.716558	0.262364	0.717125	-0.878135	1.60606	0.454006	0.493465
31	28249-77-6	S-[(4-chlorophenyl)methyl]<U+00A0>N,N-diethylcarbamothioate	CCN(CC)C(=O)SCC1=CC=C(C=C1)Cl	22	17	-0.198253	0.67018	-0.247606	0.503223	257.8	3.9	-4.20761	3.5041	1	0	Class 4 (Compounds and groups of compounds acting by a specific mechanism)	Training	-0.278327	0.342385	-0.266447	0.330363	0.022796	0.439251	0.204543	0.36085	0.323759	0.251162
32	2921-88-2	diethoxy-sulfanylidene-(3,5,6-trichloropyridin-2-yl)oxy-λ5-phosphane	CCOP(=S)(OCC)OC1=NC(=C(C=C1Cl)Cl)Cl	37	19	-2.57949	1.5151	-2.47689	1.82394	350.59	5.11	-4.68825	3.2925	1	0	Class 4 (Compounds and groups of compounds acting by a specific mechanism)	Training	-2.20262	1.88471	-2.57387	1.96894	-2.57387	1.96894	-2.56517	1.91865	-2.45518	1.75887
33	51-28-5	2,4-dinitrophenol	C1=CC(=C(C=C1[N+](=O)[O-])[N+](=O)[O-])O	10	10	0.319315	0.499159	0.25604	0.541889	184.11	1.73	-4.88273	3.405	0	1	Class 3 (unspecific reactivity)	Test	0.47753	0.703717	0.450429	0.697441	0.444239	0.6828	0.408782	0.763797	0.220819	0.441047
34	52645-53-1	(3-phenoxyphenyl)methyl 3-(2,2-dichloroethenyl)-2,2-dimethylcyclopropane-1-carboxylate	CC1(C(C1C(=O)OCC2=CC(=CC=C2)OC3=CC=CC=C3)C=C(Cl)Cl)C	27	17	-2.71335	1.2044	-2.21969	1.81374	391.29	7.43	-6.00261	3.2395	1	0	Class 4 (Compounds and groups of compounds acting by a specific mechanism)	Training	-2.5946	1.40297	-2.55576	1.34996	-1.70189	1.86885	-2.63258	1.60403	-1.88445	2.14637
35	55-63-0	1,3-dinitrooxypropan-2-yl nitrate	C(C(CO[N+](=O)[O-])O[N+](=O)[O-])O[N+](=O)[O-]	24	8	0.70033	0.632626	0.68279	0.89162	227.09	1.51	-1.56543	3.5201	0	0	Class 5 (Not possible to classify according to these rules)	Training	0.835533	0.678919	0.788881	0.701108	0.788881	0.701108	0.638417	0.896369	0.835533	0.678919
36	606-20-2	2-methyl-1,3-dinitrobenzene	CC1=C(C=CC=C1[N+](=O)[O-])[N+](=O)[O-]	15	12	1.17728	0.495601	1.07175	0.426818	182.14	2.18	-3.09366	3.2997	0	0	Class 5 (Not possible to classify according to these rules)	Test	1.00684	0.499128	0.932243	0.297428	0.799168	0.426818	1.13991	0.26928	1.14905	0.396572
37	67-66-3	chloroform	C(Cl)(Cl)Cl	12	8	1.72869	0.99352	2.22348	0.428884	119.38	1.52	2.27646	3.3737	0	0	Class 1 (narcosis or baseline toxicity)	Training	2.38786	0.296992	2.30922	0.428884	2.30922	0.428884	2.38786	0.296992	2.14484	0.435274
38	67-68-5	methylsulfinylmethane	CS(=O)C	9	8	4.3971	0.260418	4.21678	0.375707	78.13	-1.22	-0.20621	3.735	0	0	Class 5 (Not possible to classify according to these rules)	Test	4.23215	0.398583	4.23215	0.398583	4.23215	0.398583	4.23215	0.398583	4.19878	0.349606
39	71-43-2	benzene	C1=CC=CC=C1	12	10	1.6449	0.590115	1.47671	0.487741	78.1	1.99	1.94052	3.3922	0	0	Class 1 (narcosis or baseline toxicity)	Training	1.29127	0.159549	1.56975	1.03229	1.61749	0.478784	1.74669	0.850631	1.56975	1.03229
40	77-73-6	tricyclo[5.2.1.02,6]deca-3,8-diene	C1C=CC2C1C3CC2C=C3	15	12	1.34989	0.460223	1.21819	0.476825	132.2	3.16	0.217484	3.657	0	0	Class 1 (narcosis or baseline toxicity)	Training	1.21446	0.222074	1.05327	0.735984	1.05327	0.735984	1.06829	0.395647	1.13377	0.442216
41	79-00-5	1,1,2-trichloroethane	C(C(Cl)Cl)Cl	13	9	1.94063	0.317101	1.85809	0.316499	133.42	2.01	1.31387	3.3534	0	0	Class 1 (narcosis or baseline toxicity)	Test	1.81714	0.360884	1.84106	0.351209	1.88202	0.300572	1.85809	0.316499	1.69288	0.139848
42	79-01-6	1,1,2-trichloroethene	C(=C(Cl)Cl)Cl	16	11	1.67054	0.427525	1.72836	0.407003	131.4	2.47	1.86034	3.3563	0	0	Class 1 (narcosis or baseline toxicity)	Training	1.99629	0.575684	1.81177	0.752759	1.769	0.775821	1.95352	0.624771	1.5866	0.387755
43	80-05-7	4-[2-(4-hydroxyphenyl)propan-2-yl]phenol	CC(C)(C1=CC=C(C=C1)O)C2=CC=C(C=C2)O	14	8	0.692688	0.43906	0.602985	0.468715	228.29	3.64	-6.55909	3.4443	0	1	Class 3 (unspecific reactivity)	Training	0.5095	0.465884	0.486155	0.431522	0.486155	0.431522	0.618779	0.468715	0.5095	0.465884
44	84-66-2	diethyl benzene-1,2-dicarboxylate	CCOC(=O)C1=CC=CC=C1C(=O)OCC	16	11	1.24963	0.761575	1.12914	0.493266	222.24	2.65	-2.59517	3.985	0	1	Class 3 (unspecific reactivity)	Training	1.1923	0.166352	1.12333	0.808793	1.07377	0.891441	1.27219	0.232621	1.17871	0.836399
45	84-74-2	dibutyl benzene-1,2-dicarboxylate	CCCCOC(=O)C1=CC=CC=C1C(=O)OCCCC	12	10	0.0563724	0.484609	-0.0194962	0.453992	278.35	4.61	-3.64207	4.4422	0	1	Class 3 (unspecific reactivity)	Training	-0.00947944	0.39444	0.139019	0.73536	0.316428	0.434942	-0.186889	0.577672	0.157913	0.453992
46	85-68-7	2-O-benzyl 1-O-butyl benzene-1,2-dicarboxylate	CCCCOC(=O)C1=CC=CC=C1C(=O)OCC2=CC=CC=C2	23	14	0.13008	0.470889	-0.0532102	0.387827	312.39	4.84	-4.35655	4.1289	0	1	Class 3 (unspecific reactivity)	Training	-0.162551	0.10115	-0.00859003	0.572029	0.096955	0.579713	-0.186679	0.127041	-0.117723	0.389177
47	87-61-6	1,2,3-trichlorobenzene	C1=CC(=C(C(=C1)Cl)Cl)Cl	12	8	0.145201	0.316678	0.219185	0.174622	181.45	3.93	-1.14388	3.0899	0	1	Class 3 (unspecific reactivity)	Test	0.219185	0.148615	0.043182	0.174622	0.043182	0.174622	0.357818	0.158126	0.219185	0.148615
48	88-06-2	2,4,6-trichlorophenol	C1=C(C=C(C(=C1Cl)O)Cl)Cl	20	14	0.271255	0.357191	0.317492	0.365765	197.45	3.45	-2.34775	3.1065	0	1	Class 3 (unspecific reactivity)	Test	0.194205	0.568199	0.344127	0.604018	0.0871074	0.23937	0.194205	0.568199	0.126457	0.278971
49	88-72-2	1-methyl-2-nitrobenzene	CC1=CC=CC=C1[N+](=O)[O-]	15	8	1.35027	0.278187	1.40059	0.243134	137.14	2.36	-0.928118	3.473	0	0	Class 2 (less inert compounds)	Training	1.40272	0.24535	1.40272	0.24535	1.40272	0.24535	1.40272	0.24535	1.36802	0.214286
50	88-73-3	1-Chloro-2-nitrobenzene	C1=CC=C(C(=C1)[N+](=O)[O-])Cl	9	9	1.29783	0.414199	1.19126	0.359247	157.55	2.46	-1.54212	3.3467	0	1	Class 3 (unspecific reactivity)	Training	0.961025	0.52768	1.0973	0.512986	1.07998	0.509768	0.916846	0.455729	1.37171	0.0397677
51	90-15-3	naphthalen-1-ol	C1=CC=C2C(=C1)C=CC=C2O	25	21	0.340973	0.576049	0.631446	0.639	144.17	2.69	-3.56225	3.6794	0	1	Class 3 (unspecific reactivity)	Test	0.533156	0.64329	0.203837	0.923183	0.197762	0.923632	0.654564	0.490889	1.0319	0.901058
52	91-22-5	quinoline	C1=CC=C2C(=C1)C=CC=N2	19	13	1.60455	0.443683	1.631	0.214374	129.16	2.14	-1.26841	3.6614	0	0	Class 1 (narcosis or baseline toxicity)	Training	1.39927	0.557093	1.37824	0.546145	1.88452	0.107517	1.60997	0.185992	1.39502	0.566837
53	92-52-4	1,1'-biphenyl	C1=CC=C(C=C1)C2=CC=CC=C2	12	8	-0.524625	0.952438	-0.240532	1.25577	154.2	3.76	-1.72816	3.635	0	0	Class 1 (narcosis or baseline toxicity)	Training	-0.240532	1.25577	-0.175231	1.28003	-0.175231	1.28003	-0.240532	1.25577	0.174508	0.713005
54	95-47-6	1,2-xylene	CC1=CC=CC=C1C	17	12	1.09526	0.548061	0.638309	0.461938	106.17	3.09	0.833147	3.5575	0	0	Class 1 (narcosis or baseline toxicity)	Training	0.721155	0.461938	0.721155	0.461938	0.678607	0.396011	0.638309	0.496851	0.616648	0.306405
55	95-53-4	2-methylaniline	CC1=CC=CC=C1N	8	8	1.76968	0.658611	1.32106	0.652537	107.2	1.62	-0.449772	3.5162	0	0	Class 2 (less inert compounds)	Training	1.59217	0.458769	1.52598	0.352257	1.52598	0.352257	1.2614	0.706944	1.59217	0.458769
56	95-76-1	3,4-dichloroaniline	C1=CC(=C(C=C1N)Cl)Cl	20	13	0.209871	0.952433	-0.0673921	0.932901	162.02	2.37	-2.51286	3.1749	0	1	Class 3 (unspecific reactivity)	Training	0.0957945	1.04654	-0.0138845	0.932901	0.0968631	1.08674	-0.0138845	0.932901	-0.287786	0.744787
57	95-95-4	2,4,5-trichlorophenol	C1=C(C(=CC(=C1Cl)Cl)Cl)O	14	12	-0.09221	0.262275	-0.0132398	0.218651	197.5	3.45	-2.29499	3.1065	0	1	Class 3 (unspecific reactivity)	Test	0.113983	0.122621	0.165274	0.081226	-0.0132398	0.342788	0.0760023	0.101716	-0.0621019	0.311308
58	98-82-8	cumene	CC(C)C1=CC=CC=C1	10	8	0.546134	0.296074	0.46162	0.246613	120.19	3.45	0.555094	3.6107	0	0	Class 1 (narcosis or baseline toxicity)	Training	0.702665	0.382487	0.391799	0.177231	0.487055	0.16155	0.442221	0.252829	0.35454	0.181618
59	98-95-3	nitrobenzene	C1=CC=C(C=C1)[N+](=O)[O-]	10	8	1.63353	0.299498	1.52216	0.195383	123.11	1.81	-0.677781	3.5666	0	0	Class 2 (less inert compounds)	Training	1.54581	0.195383	1.4024	0.0552712	1.4024	0.0552712	1.46268	0.1144	1.54581	0.195383
60	99-99-0	1-methyl-4-nitrobenzene	CC1=CC=C(C=C1)[N+](=O)[O-]	16	8	1.40422	0.404726	1.24121	0.471304	137.14	2.36	-1.56067	3.473	0	0	Class 2 (less inert compounds)	Training	1.2687	0.471304	1.06489	0.433985	1.28384	0.473819	1.22401	0.413262	1.06489	0.433985

## Sheet: Table_S2_Best_models
Table S2. Full-model-averaged standardized parameter estimates for five randomly chosen bootstrapped sample sets (see Table 2 for more details)
Predictors	Randomly chosen dataset
	1	2	3	4	5
Mean
3 species mean	0.923329	0.917962	0.902293	0.911825	0.876704
3 species SD	NA	NA	NA	NA	NA
Biodegradability	0.0321871	0.00578933	0.00653918	0.00208605	0.0114437
Class 3	0.0117576	0.00216049	-0.00162214	0.0384999	4.70323e-05
Class 4	-0.0666501	-0.052163	-0.0606599	-0.0930159	-0.0402525
LogKow	0.0158538	0.0301757	-0.00272268	0.0105097	-0.0705257
LogVP	-0.00153045	0.00105334	-0.0041643	0.0223797	-0.00125279
Molecular weight	-0.0243352	-0.0638783	-0.0485908	0.00378669	-0.0381307
SD
3 species mean	NA	NA	NA	NA	NA
3 species SD	0.546463	0.576941	0.67528	0.487216	0.643517
Biodegradability	-0.0290876	-0.0651113	-0.0623529	-0.0345978	-0.0694479
Class 3	0.00877766	0.00359325	-0.00660096	0.00391348	0.00115241
Class 4	0.306259	0.345692	0.177857	0.455308	0.19954
LogKow	0.0156074	0.0113442	0.0283146	0.0305566	0.00418223
LogVP	0.309155	0.159851	0.191393	0.0942375	0.143745
Molecular weight	0.234097	0.0278255	0.07158	0.0219812	0.0695913
Predictors whose model-averaged coefficients are in red were selected in the best models

## Sheet: Table_S3_Model_evaluation
Table S3. Model evaluation for five randomly chosen bootstrapped sample sets (see Table 3 for more details)
Statistics	Randomly chosen dataset
	1	2	3	4	5
Mean: 3-species mean
AICc	29.172	31.2418	35.1416	37.5212	45.7228
Internal validation
r2	0.946391	0.943868	0.938786	0.935462	0.922559
RMSE	0.310996	0.318231	0.332323	0.341227	0.373784
q2	0.940348	0.937292	0.930745	0.928823	0.91231
External validation
r2ext	0.861573	0.860801	0.74317	0.891729	0.801632
RMSEext	0.464388	0.465682	0.632549	0.410703	0.555914
Q2ext	0.860077	0.853926	0.731539	0.887468	0.798782
# of parameters	1	1	1	1	1
Mean: 3-species mean plus descriptors
AICc	24.9608	27.9688	32.1402	31.0435	40.8698
Internal validation
r2	0.953731	0.950532	0.945727	0.947034	0.937722
RMSE	0.288922	0.298742	0.312914	0.309125	0.335198
q2	0.945979	0.940629	0.93505	0.938705	0.912135
External validation
r2ext	0.887777	0.88292	0.803916	0.923457	0.854293
RMSEext	0.418131	0.427083	0.552704	0.345323	0.476444
Q2ext	0.883826	0.873333	0.795133	0.909506	0.854204
# of parameters	2	2	2	2	3
SD: 3-species SD
AICc	-1.66713	-5.72009	-8.49214	1.64749	-7.93496
Internal validation
r2	0.556533	0.594729	0.61894	0.522635	0.614193
RMSE	0.22077	0.211049	0.204647	0.229053	0.205918
q2	0.521745	0.560983	0.584768	0.483189	0.570938
External validation
r2ext	0.758501	0.6346	0.73124	0.876431	0.691453
RMSEext	0.169632	0.208657	0.17895	0.12134	0.191739
Q2ext	0.498034	0.391216	0.543512	0.698703	0.537816
# of parameters	1	1	1	1	1
SD: 3-species SD plus descriptors
AICc	-9.5963	-12.2759	-11.0386	-11.6088	-10.0678
Internal validation
r2	0.686132	0.686185	0.677437	0.663015	0.670402
RMSE	0.18573	0.185715	0.188286	0.192449	0.190328
q2	0.599145	0.609747	0.59797	0.592593	0.586832
External validation
r2ext	0.650159	0.617695	0.775582	0.740589	0.708388
RMSEext	0.204167	0.21343	0.163523	0.17581	0.186403
Q2ext	0.521517	0.431136	0.595606	0.629299	0.574365
# of parameters	4	3	3	2	3
Coefficient of variation
Statistics	3-species mean plus descriptors	3-species SD plus descriptors
r2	0.00636819	0.0148969
RMSE	0.0562897	0.0155589
q2	0.0140292	0.0142686
r2ext	0.0512257	0.0924433
RMSEext	0.172883	0.107849
Q2ext	0.0497824	0.140447

## Sheet: Best_Models
Outputs from R
Best model with descriptors for SSD mean	Best model with descriptors for SSD SD
lm(formula = Mean ~ Class3 + Class4 + LogKow + 1) Coefficients: Estimate Std. Error t value Pr(>|t|) (Intercept) 1.94456 0.28774 6.758 3.62e-08 *** Class3 -0.69003 0.28378 -2.432 0.019489 * Class4 -2.37609 0.42148 -5.638 1.42e-06 *** LogKow -0.31637 0.08769 -3.608 0.000831 *** --- Signif. codes: 0 ‘***’ 0.001 ‘**’ 0.01 ‘*’ 0.05 ‘.’ 0.1 ‘ ’ 1 Residual standard error: 0.8621 on 41 degrees of freedo…	lm(formula = SD ~ Class4 + 1) Coefficients: Estimate Std. Error t value Pr(>|t|) (Intercept) 0.61811 0.03893 15.876 < 2e-16 *** Class4 0.67989 0.10662 6.376 1.04e-07 *** --- Signif. codes: 0 ‘***’ 0.001 ‘**’ 0.01 ‘*’ 0.05 ‘.’ 0.1 ‘ ’ 1 Residual standard error: 0.2431 on 43 degrees of freedom Multiple R-squared: 0.486, Adjusted R-squared: 0.4741 F-statistic: 40.66 on 1 and 43 DF, p-value: 1.036e-07
Model with 3-species mean for SSD mean	Model with 3-species SD for SSD SD
lm(formula = Mean ~ Median_mean_3sp) Coefficients: Estimate Std. Error t value Pr(>|t|) (Intercept) 0.01594 0.04572 0.349 0.729 Median_mean_3sp 1.06444 0.03469 30.680 <2e-16 *** --- Signif. codes: 0 ‘***’ 0.001 ‘**’ 0.01 ‘*’ 0.05 ‘.’ 0.1 ‘ ’ 1 Residual standard error: 0.2872 on 43 degrees of freedom Multiple R-squared: 0.9563, Adjusted R-squared: 0.9553 F-statistic: 941.3 on 1 and 43 DF, p-value:…	lm(formula = SD ~ Median_SD_3sp + 1) Coefficients: Estimate Std. Error t value Pr(>|t|) (Intercept) 0.33220 0.04665 7.121 8.60e-09 *** Median_SD_3sp 0.57988 0.05783 10.026 7.97e-13 *** --- Signif. codes: 0 ‘***’ 0.001 ‘**’ 0.01 ‘*’ 0.05 ‘.’ 0.1 ‘ ’ 1 Residual standard error: 0.1856 on 43 degrees of freedom Multiple R-squared: 0.7004, Adjusted R-squared: 0.6934 F-statistic: 100.5 on 1 and 43 DF, p…
Model with 3-species mean plus descriptors for SSD mean	Model with 3-species SD plus descriptors for SSD SD
lm(formula = Mean ~ Class4 + Median_mean_3sp + 1) Coefficients: Estimate Std. Error t value Pr(>|t|) (Intercept) 0.07388 0.05687 1.299 0.201 Class4 -0.26839 0.16215 -1.655 0.105 Median_mean_3sp 1.01652 0.04467 22.757 <2e-16 *** --- Signif. codes: 0 ‘***’ 0.001 ‘**’ 0.01 ‘*’ 0.05 ‘.’ 0.1 ‘ ’ 1 Residual standard error: 0.2816 on 42 degrees of freedom Multiple R-squared: 0.959, Adjusted R-squared: 0…	lm(formula = SD ~ Class4 + LogVP + Median_SD_3sp+ 1) Coefficients: Estimate Std. Error t value Pr(>|t|) (Intercept) 0.39421 0.04904 8.039 5.86e-10 *** Class4 0.29709 0.11185 2.656 0.0112 * LogVP 0.02033 0.01103 1.844 0.0724 . Median_SD_3sp 0.47543 0.07461 6.372 1.28e-07 *** --- Signif. codes: 0 ‘***’ 0.001 ‘**’ 0.01 ‘*’ 0.05 ‘.’ 0.1 ‘ ’ 1 Residual standard error: 0.1738 on 41 degrees of freedom M…
